# 1 Death in Venice: A Digital Reconstruction of a Large 2 Plague Outbreak During 1630-1631

3 Gianrocco Lazzari<sup>1,\*,+</sup>, Giovanni Colavizza<sup>2,\*,+</sup>,  
4 Fabio Bortoluzzi<sup>3</sup>, Davide Drago<sup>3</sup>, Andrea Erbosio<sup>3</sup>, Francesca Zugno<sup>3</sup>,  
5 Frédéric Kaplan<sup>3</sup>, Marcel Salathé<sup>1</sup>

6 <sup>1</sup> Digital Epidemiology Laboratory, School of Life Sciences, École Polytechnique Fédérale  
7 de Lausanne (EPFL), Switzerland.

8 <sup>2</sup> University of Amsterdam, Netherlands.

9 <sup>3</sup> Digital Humanities Laboratory, College of Humanities, École Polytechnique Fédérale de  
10 Lausanne (EPFL), Switzerland.

11 \*[gianrocco.lazzari@epfl.ch](mailto:gianrocco.lazzari@epfl.ch); [g.colavizza@uva.nl](mailto:g.colavizza@uva.nl).

+ Equal contribution.

*“Sia laudato il signor Iddio non  
ci sono stati morti.”*

Bless the Lord, there have been  
no deaths [today].

---

December 24<sup>th</sup> 1630, in  
*Sant’Eufemia*, Venice.

## 12 Abstract

13 The plague, an infectious disease caused by the bacterium *Yersinia pestis*, is widely con-  
14 sidered to be responsible for the most devastating and deadly pandemics in human history.  
15 Starting with the infamous *Black Death*, plague outbreaks are estimated to have killed  
16 around 100 million people over multiple centuries, with local mortality rates as high as  
17 60%. However, detailed pictures of the disease dynamics of these outbreaks centuries  
18 ago remain scarce, mainly due to the lack of high-quality historical data in digital form.  
19 Here, we present an analysis of the 1630-31 plague outbreak in the city of Venice, using  
20 newly collected daily death records. We identify the presence of a two-peak pattern, for  
21 which we present two possible explanations based on computational models of disease  
22 dynamics. Systematically digitized historical records like the ones presented here promise  
23 to enrich our understanding of historical phenomena of enduring importance. This work  
24 contributes to the recently renewed interdisciplinary foray into the epidemiological and  
25 societal impact of pre-modern epidemics.

## 26 Main text

27 Disease outbreaks of the plague in the past centuries have been so devastating throughout  
28 Eurasia that the term *plague* has become synonymous with a terrible disease. By killing  
29 a substantial proportion of the human population, which took multiple generations to  
30 recover, plague pandemics have had enormous impacts on the development of Eurasia.  
31 Correspondingly, historical questions, such as the role of institutions and the socioeco-  
32 nomic impact of plague outbreaks [1], as well as epidemiological questions, such as the  
33 causes, nature and interactions of vectors [2, 3, 4, 5], seasonality and climatic patterns  
34 [6, 7] and even the distinction between plague and the Black Death [8], are still being  
35 investigated. While previous studies have highlighted some common traits to plague epi-  
36 demics [9], such as the high impact on densely-inhabited cities acting as hotspots [10, 11],  
37 the importance of human-to-human transmission [12] and the effect of the plague on dif-  
38 ferent sexes [13], little is known about local outbreaks, due to the lack of detailed historical  
39 data.

40 We analyze high-quality data from death records created during the 1630-31 plague  
41 epidemic in Venice, whose initial investigation is limited and by now dated [14]. This  
42 epidemic was part of the so-called “Second Pandemic”, which started with the Black  
43 Death and lasted until the early 19<sup>th</sup> century. Originated in northern Europe (modern  
44 France and the Rhineland) in 1623, this epidemic crossed the Alps approximately in 1629,  
45 in the case of the territories of the Republic of Venice likely carried by imperial armies  
46 on their way to Mantua. The cause of this specific outbreak in Venice has been linked to  
47 the bacterial species *Yersinia pestis* [15], and with a set of surprising results, including an  
48 uneven and unexpected impact on different cohorts by sex and age, a high parallel increase  
49 of mortality due to a synchronous smallpox epidemic and a raise in public violence [16].

50 Venetian death records from this period, also referred to as *necrologies*, are organized  
51 by parish and contain the systematic registration of every death among the resident pop-  
52 ulation. These necrologies, edited by the parson, were established by decree since 1504  
53 and kept in the archives of the responsible magistracy [17]. While death records were  
54 commonplace in all Christendom since the late Middle ages, and are commonly used for  
55 demography studies including on the plague [18, 1], Venetian records were particularly  
56 detailed. In the Patriarchal Archives of Venice, 54 out of more than 70 existing parishes at  
57 the time possess at least part of the registrations for the plague year (September 1630 to  
58 September 1631), while in the State Archive of Venice, the extant records for the plague  
59 year are few and scattered. Based on our assessments, these record series are overlapping  
60 and one (the former) constitutes the source for the other (the latter). We thus focus our  
61 efforts on the Patriarchal records. An example page from a necrology record is shown in  
62 Figure 1. Necrology records were kept in tiny and oblong books, with entries grouped  
63 chronologically by day. Typically, the most recurring details given for every entry were:  
64 the name, profession, sex and age of the person, the cause of death, approximate length  
65 of illness and whether a doctor attended them or not. The main dataset we use in what  
66 follows contains the number of daily deaths per parish. Data were collected following the  
67 work-flow illustrated in Figure 1; more details are given in the **SI**.

68

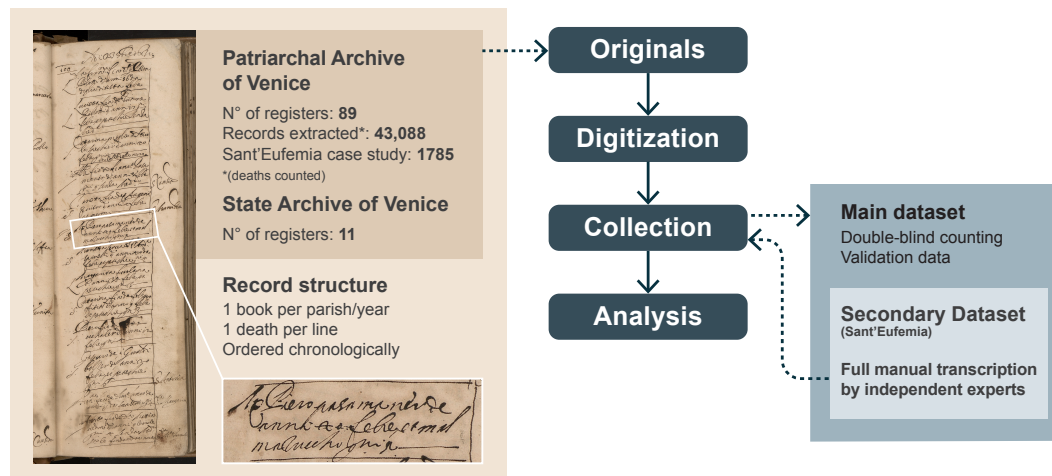

Figure 1: Illustration of the data collection workflow and datasets, including an example page from a death records book. The zoomed-in registration reads as follows: “*Messer Piero pasamaner de anni 40 febre et mal mazuccho giorni 5*”, which roughly translates to “Mister Piero pasamaner’s weaver aged 40 fever and plague 5 days.” What is meant is that Mister Peter, a pasamaner’s weaver forty of age (approximately), died of fever and plague after five days of sickness. It was the 23<sup>rd</sup> of October, 1630 (as it can be read at the top of the page).

69 Our data aggregated over all parishes clearly shows the massive outbreak which took  
70 place between the September and December of 1630, as detailed in Figure 2a. The  
71 death counts are staggering: 20,923 deaths between September and December 1630 alone,  
72 followed by 10,430 between January and August 1631. In total, 43,088 deaths were  
73 recorded over just three years. These numbers are in line with the 35% estimated mortality  
74 in northern Italy during the same epidemic outbreak [1], and should be compared to an  
75 estimated average annual mortality between 3.7 and 2.7% (but 29.7% for newly-born  
76 infants) during the whole seventeenth century [19, 20]. We stress that not all death  
77 records survived, therefore these numbers must be taken to represent a lower bound of  
78 the actual death toll. Historical demographic sources, even though uncertain [21], report  
79 a population of 141,625 inhabitants for Venice in 1624 and of 102,243 in 1633, a reduction  
80 of 27,81% [19, 20].

81 The presence of a single peak of deaths is common in plague outbreaks within densely  
82 populated regions and cities [6, 5]. Its presence in Venice indicates that the authorities’  
83 best efforts to contain the epidemic – for example by gathering all sick people in public  
84 hospitals or in their houses [16] – simply failed. The city was too densely populated and  
85 well-connected to leave any margin for containment. In fact, as it can be seen in Figure  
86 SI1 (and especially SI1c), the outbreak in 1630 swept through the parishes practically in  
87 sync, as no discernible space correlation is present. However, while the outbreak in 1630  
88 is known, the subsequent 1631 long tail of high mortality has not been described in the  
89 literature before.

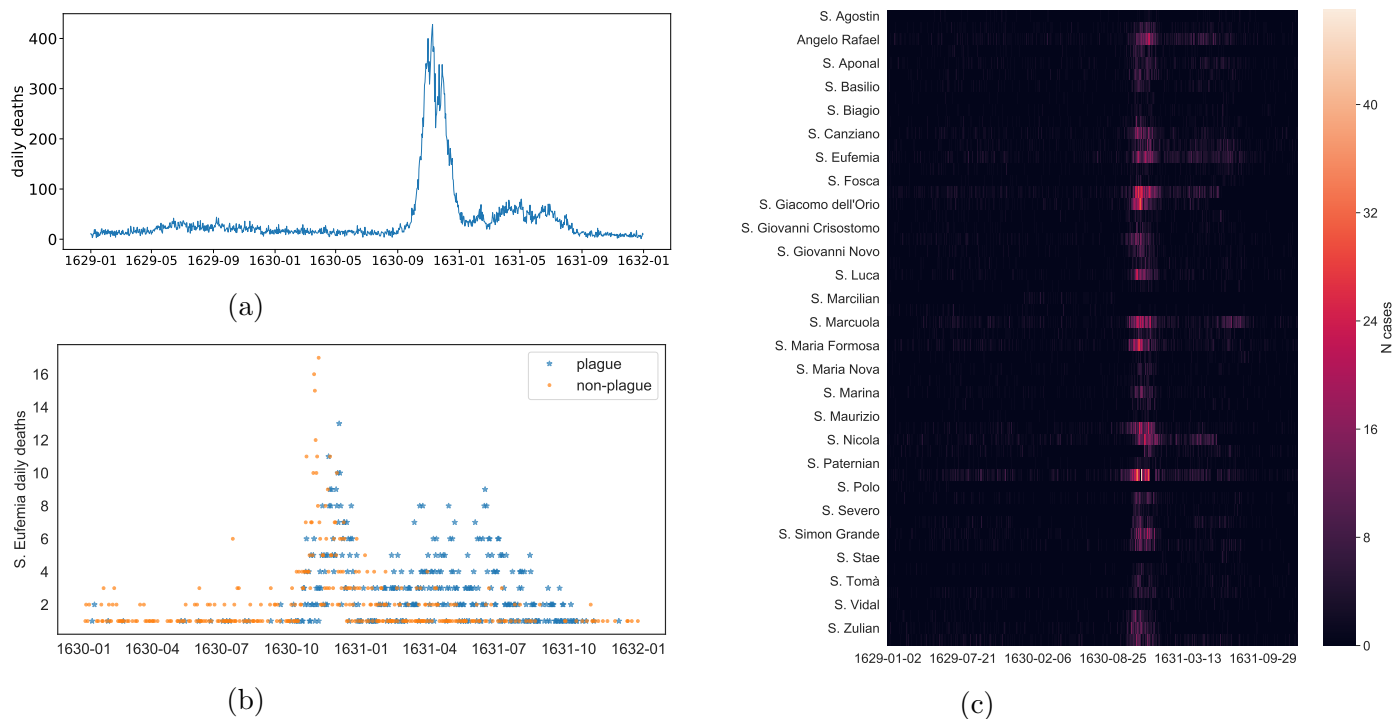

Figure 2: An overview of the full plague outbreak (main dataset): (a) Cumulative daily deaths for the whole recorded period (1095 days in total). A total number of 43,088 deaths were reported. One can clearly see the presence of a two-stage process, spanning until fall 1631. (b) Daily deaths recorded in the parish of *Sant'Eufemia*, almost surely due to plague (blue stars –  $N_{plague} = 1007$ ) and possibly to other causes (orange circles –  $N_{not\ plague} = 778$ ). Only days when someone died are considered. (c) A heatmap view of the dataset; for the sake of clarity, not all parishes names are plotted.

90 In order to gain a better understanding of the disease dynamics, we investigated an-  
 91 other dataset taken from the records of a specific parish: *Sant'Eufemia*. This was a  
 92 populous parish, with a significant amount of deaths in the 1631 tail and whose necrology  
 93 records are well-preserved in their entirety. We transcribed all the information available in  
 94 its necrologies, i.e. the name, sex and age at death of each person, together with the cause  
 95 of death and the length of sickness. This transcription includes 1785 deaths registered  
 96 between January 1630 and December 1631. The identification of deaths due to plague  
 97 appears to be deceptively simple, as they were usually registered as fatalities caused by  
 98 suspicious illness (“*mal sospetto*”), or with visible buboes. Nevertheless, previous studies  
 99 have taken a more inclusive approach, considering also deaths not clearly caused by other  
 100 factors as due to plague [16]. We take the more conservative approach in what follows  
 101 – see Tables SI1, SI2 and SI3 for details on which causes of death were considered to be  
 102 plague.

103 The statistics of the causes of death give us a first insight. In Figure SI2a we show the  
 104 distribution of deaths grouped by cause and (conservatively) classified as related to the  
 105 plague or not. One can see how the two distributions are skewed, meaning that a small

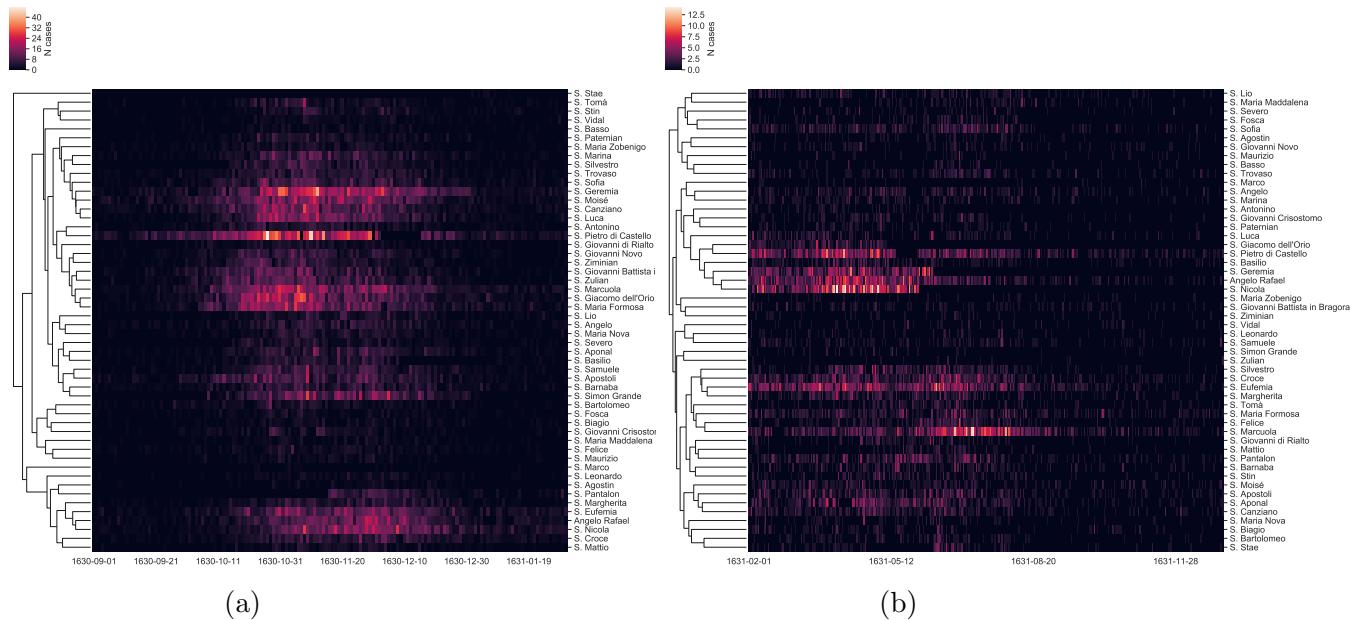

Figure 3: Hierarchical clustering of parishes zoomed on the main late-1630 peak (a) and on the 1631 outbreaks (b).

106 fraction of causes (5%) contributes to a large fraction of deaths (63%). However, while  
 107 the number of deaths clearly due to plague ( $N_{plague} = 1007$ ) and possibly non-plague  
 108 are similar ( $N_{not\ plague} = 778$ ), only 56 out of 156 causes could be clearly attributed to  
 109 plague, leaving more vagueness around the non-plague causes (in Figure SI2b the causes  
 110 with more than 50 deaths are listed). This seems to suggest that our plague-death counts  
 111 likely constitute a lower bound of the total number of deaths directly linked to plague,  
 112 which we cannot further refine from the records. In Figure 2b we show the time-series  
 113 of deaths belonging to the *Sant'Eufemia* parish, distinguishing between those caused by  
 114 the plague and the ones possibly due to other causes. Surprisingly, the first peak of the  
 115 epidemic begins with few references to the common symptoms of the plague (October to  
 116 November), when the records point instead to more generic and common illnesses, such as  
 117 fever or spasms [17]. Only afterwards the records start to extensively mention the plague  
 118 as the cause of death, well into the Fall of 1631. This might indicate an initial reticence to  
 119 acknowledge the epidemic outbreak, as well as a subsequent possible overemphasis of it.  
 120 This reticence might be caused by the public authorities' practice to quarantine the whole  
 121 household in their house when someone from it died of plague. It might also be due to  
 122 a surveillance issue generating a bias in the records: while many deaths were occurring,  
 123 medical examination was no longer taking place and the registrations of the causes of  
 124 death were not happening regularly, but instead in batches, leading to approximations.  
 125 Furthermore, several people were moved to quarantine areas (*lazzaretti*) and died there,  
 126 while their registration happened subsequently, possibly by reporting generic causes of  
 127 death. It is thus likely that these deaths are also in large part attributable to plague.  
 128 However, other explanations are also possible, such as a known epidemic of smallpox  
 129 co-occurring during the main peak [16]. Despite these limitations and open questions,  
 130 *Sant'Eufemia*'s causes of death confirm the duration of the epidemic well into the autumn

131 of 1631.

132 We further verify that deaths by plague were not significantly affected by sex, under the  
133 reasonable assumption that sexes were equally distributed in the population of Venice at  
134 the time [20]. Indeed, the male to female deaths ratio was close to one ( $N_{male}/N_{female} =$   
135  $865/917 \sim 0.94$ ), a result confirmed by the majority of the literature [1, 12, 22, 23,  
136 24, 25], with few exceptions [16, 13]. Furthermore, the distribution of illness duration  
137 and of age at death did not significantly change with sex (see Figure SI3a and SI3b  
138 respectively). Assessing the effect of the plague on age is challenging, as assumptions on  
139 the age distribution of population at that time are quite difficult to make and historical  
140 statistics are hard to find. Furthermore, the literature on the effect of the plague on  
141 different age cohorts is still ambiguous. Nevertheless, our data are in line with previous  
142 studies [26, 27, 18, 28, 1] indicating that the plague had higher relative impact among age  
143 cohorts of typically low mortality, in particular adolescents and adults between 14 and 44  
144 years of age, as shown in Figure SI3c and Figure SI3d.

145 Figure 2c shows the heatmap of reported cases, for each of the parishes of Venice,  
146 for the entire time window ( $N_{tot\_deaths} = 43088$ ). One can see that while the main out-  
147 break occurring in the last four months of 1630 shows good synchronization across all  
148 parishes, the second, smaller outbreak occurring until fall 1631 seems to have peaked at  
149 rather different time points within each parish, between February and July 1631. We  
150 therefore investigate whether space patterns are present, especially in the 1631 outbreaks  
151 ( $N_{deaths\_tail} = 10363$ ). In order to assess the presence of spatial patterns, we simply  
152 plot the pairwise correlation among cases for all couples of parishes, against the distance  
153 between parishes (Figure SI4). The resulting scatter plots show no spatial patterns. Nev-  
154 ertheless, the secondary outbreak in 1631 does not seem to have peaked as homogeneously  
155 as the first large outbreak in 1630 (Figure 2c). We hence performed a clustering analysis  
156 to highlight possible groups of rather synchronous parishes (Figure 3). The analysis on  
157 the main 1630 outbreak (Figure 3a) appears instead to be in sync across parishes.

158 The clustering on the 1631 outbreaks (Figure 3b) shows clusters of parishes with more  
159 spread-out peaks, across the first half of 1631, with tails reaching the fall of the same  
160 year. The main cluster is the one led by the three populous parishes of *S. Geremia*,  
161 *Angelo Rafael* and *S. Nicola*, with peaks between March and May 1631 (central part of  
162 Figure 3b). Another cluster is the one led by the *S. Eufemia* and *S. Marcuola* parishes  
163 (bottom part of Figure 3b), a more heterogeneous group, with peaks occurring mostly in  
164 June/July 1631.

165  
166 Even though these clusters seems to be well separated in time, there is no clear evidence  
167 of a specific process or event in the history of the city that might have driven this spatial  
168 distribution of localized epidemics in different parishes during 1631. We therefore assess  
169 epidemiological models on data aggregated over all parishes. The plague is generally  
170 modeled as a zoonosis, in which the transition from an epizootic (typically, in rodents) to  
171 a human epidemic is mediated by animal fleas, the vector carrying *Yersinia Pestis* [30, 29].  
172 From here on, we refer to this model as the Rats-Fleas-Humans (RFH) model. At the  
173 same time, other studies suggest that these models are not always preferable to explain the  
174 outbreaks dynamics, especially due to the ‘efficacy and speed’ of some historical plague

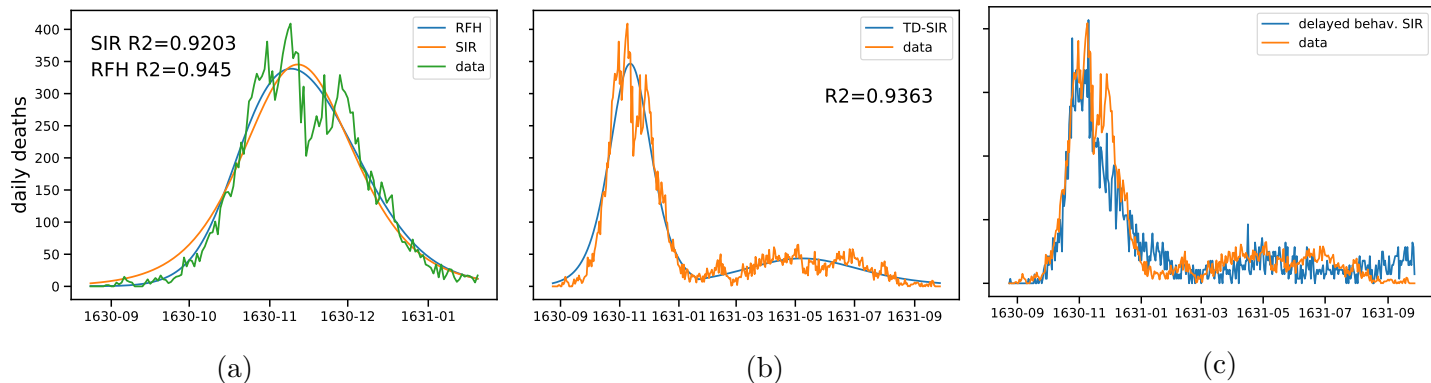

Figure 4: (a) Best fit comparison of a simple SIR model against the model from [29] on the main outbreak peak (150 days time window). (b) Best fit of an explicit time-dependent SIR; parameters are shown in Figure SI5d. (c) Example realization of a stochastic delayed behavioral SIR; the evolution of transmission rate  $\beta(I)$  is shown in Figure SI5e.

175 outbreaks [1], if compared to the typical dynamics of RFH models. We first confirm  
176 that neither a deterministic RFH nor a deterministic Susceptible-Infected-Removed (SIR)  
177 model can explain the presence of the 1631 secondary outbreaks (see Figure SI5b). We  
178 then investigate the transmission nature of the Venice plague, by considering separately  
179 the main 1630 outbreak and the one in 1631. In both cases, we find that the RFH model  
180 did not perform much better than a simple SIR model, as shown in Figure 4a (main 1630  
181 outbreak), and Figure SI5c (1631 outbreaks). We therefore implement a time-dependent  
182 SIR and find that it can better explain the dynamics over the entire time window (Figure  
183 4b), with an increase in the basic reproduction number that could indicate a change in  
184 the transmission mechanism of pathogen (for clarity, fitted parameters are reported in  
185 Figure SI5d). In particular this might suggest a transition from bubonic to pneumonic  
186 plague, a shift already hypothesized for other historical plague epidemics [31]. However,  
187 a change in the effective transmission rate might also be due to people’s behavioral response  
188 to the outbreak. In order to investigate the fitness of such hypothesis, we implement a  
189 stochastic delayed behavioral SIR (details can be found in the **Methods**). In Figure 4c  
190 we show one example of such model’s stochastic realizations, which presents both a main  
191 peak and a long tail dynamics. This shows that a change in pathogen’s transmission  
192 route is not necessarily required in order for the epidemic to show a non-trivial temporal  
193 pattern, such as the one present in our data. For the sake of completeness we also check  
194 whether a deterministic delayed behavioral SIR would fit our data. In Figure SI6b, we  
195 show that it cannot actually reproduce the 1631 tail, in spite of a good fit of the first part  
196 of the 1630 outbreak.

197 Although a change in diffusion parameters seems to provide a reasonable explanation of  
198 the two-peak structure, we investigate the possibility of having two-peak outbreaks similar  
199 to the observed one, as a result of the stochastic nature of the disease spread combined  
200 with structural properties of the host network. It is indeed known that the community  
201 structure of a network can strongly impact epidemic dynamics [32]. We therefore perform  
202 a series of stochastic simulations of a simple SIR process on top of a small-world graph,

203 a network model which is likely to resemble the modular structure of social contacts [33]  
204 (further details on the simulations are given in the **Methods**). We find that few simulated  
205 epidemics do resemble the data, as shown in Figure SI6a. However, as this happens in only  
206 about 0.1% of the simulations, such alternative interpretation of the 1631 tail based on  
207 pure stochastic effects and network structure, although reasonable, remains very unlikely.

208 In summary, we find a novel epidemic pattern of two peaks in the 1630-31 plague  
209 outbreak in Venice. The first peak in 1630 was very high, and the outbreak highly  
210 synchronized among all parishes; the second peak in 1631 shows temporal variability, and  
211 was much less pronounced in strength. Most previous recorded cases show a single main  
212 peak [6, 29, 5] of varying duration [18, 12], with possible cyclical recurrence [6]. Relying  
213 on fine-grained daily death records [1], we are able to confirm that the plague spanned  
214 both the main peak and the long tail, over a period of more than a year and caused the  
215 death of approximately 30% of the city's population.

216 Providing an interpretation of the two-stage process remains challenging with the  
217 evidence at our disposal. Firstly, not all deaths could be clearly attributed to the plague  
218 during the early weeks of the main peak. Generic causes of death such as fever and spasms  
219 might indicate plague deaths as well as deaths due to other causes. A first hypothesis  
220 is therefore that the same plague epidemic went on for more than a year, while being  
221 aggravated by other concomitant causes during the main peak. An alternative hypothesis  
222 is that two distinct plague epidemics took place instead, one during the main peak and  
223 another during the long tail. Previous studies suggest the possibility of a transition from a  
224 mainly bubonic to a mainly pneumonic plague, for example. Furthermore, we show that it  
225 is also possible that such temporal pattern could be generated by the adaptation of hosts'  
226 behavior to the increase of number of infected, effectively decreasing the transmission  
227 rate, as the outbreak advances. Lastly, social factors such as the timing and effectiveness  
228 of public containment policies could have played a role.

229 Further investigations will be needed in order to fully qualify the Venetian 1630-31  
230 plague outbreak, as well as the Second Pandemic overall. Indeed, as we have shown,  
231 historical records contain information which has so far been relied upon only to study few  
232 episodes but, when digitized and made available at scale and systematically, can help cast  
233 new light on these long-lasting research issues. For an understanding of detailed local  
234 dynamics, but also of global patterns of disease spread, modern human data and animal  
235 research can now be complemented with digital data collection driven by the digital and  
236 medical humanities.

### 237 **Author contributions statement**

238 G.L. and G.C. performed the analysis. D.D., F.Z., F.B., A.E. and G.C. performed data  
239 collection. G.L., G.C., M.S. and F.K. wrote the paper. M.S. and F.K. supervised the  
240 study.

### 241 **Competing interests**

242 The authors declare no conflict of interests.



## 243 Acknowledgements

244 We would like to thank the support of the Patriarchal Archive of Venice and the State  
245 Archive of Venice during data collection. We thank Paolo de los Rios and Giulio Rossetti  
246 for useful discussions on diffusion processes on networks, and gratefully acknowledge the  
247 help of Laurent Bolli in designing Figure 1.

## 248 References

- 249 [1] Guido Alfani and Tommy E. Murphy. Plague and Lethal Epidemics in the Pre-  
250 Industrial World. *The Journal of Economic History*, 77(01):314–343, March 2017.
- 251 [2] M. J. Keeling and C. A. Gilligan. Metapopulation dynamics of bubonic plague.  
252 *Nature*, 407(6806):903–906, 2000.
- 253 [3] Michel Drancourt, Linda Houhamdi, and Didier Raoult. *Yersinia pestis* as a telluric,  
254 human ectoparasite-borne organism. *The Lancet infectious diseases*, 6(4):234–241,  
255 2006.
- 256 [4] Anne Karin Hufthammer and Lars Walløe. Rats cannot have been intermediate hosts  
257 for *Yersinia pestis* during medieval plague epidemics in Northern Europe. *Journal of*  
258 *Archaeological Science*, 40(4):1752–1759, April 2013.
- 259 [5] Katharine R. Dean, Fabienne Krauer, Lars Walløe, Ole Christian Lingjærde, Barbara  
260 Bramanti, Nils Chr. Stenseth, and Boris V. Schmid. Human ectoparasites and the  
261 spread of plague in Europe during the Second Pandemic. *Proceedings of the National*  
262 *Academy of Sciences*, page 201715640, January 2018.
- 263 [6] Mark R. Welford and Brian H. Bossak. Validation of Inverse Seasonal Peak Mortality  
264 in Medieval Plagues, Including the Black Death, in Comparison to Modern *Yersinia*  
265 *pestis*-Variant Diseases. *PLoS ONE*, 4(12):e8401, 2009.
- 266 [7] Boris V. Schmid, Ulf Büntgen, W. Ryan Easterday, Christian Ginzler, Lars Walløe,  
267 Barbara Bramanti, and Nils Chr. Stenseth. Climate-driven introduction of the Black  
268 Death and successive plague reintroductions into Europe. *Proceedings of the National*  
269 *Academy of Sciences*, 112(10):3020–3025, March 2015.
- 270 [8] G. Christakos, R. A. Olea, and H. L. Yu. Recent results on the spatiotemporal  
271 modelling and comparative analysis of Black Death and bubonic plague epidemics.  
272 *Public Health*, 121(9):700–720, 2007.
- 273 [9] Kenneth L. Gage and Michael Y. Kosoy. Natural History of the Plague: Perspectives  
274 from More than a Century of Research. *Annual Review of Entomology*, 50(1):505–528,  
275 January 2005.
- 276 [10] José M. Gómez and Miguel Verdú. Network theory may explain the vulnerability  
277 of medieval human settlements to the Black Death pandemic. *Scientific Reports*,  
278 7:43467, 2017.

- 279 [11] Ricci P. H. Yue, Harry F. Lee, and Connor Y. H. Wu. Trade routes and plague  
280 transmission in pre-industrial Europe. *Scientific Reports*, 7(1):12973, December 2017.
- 281 [12] Lilith K. Whittles and Xavier Didelot. Epidemiological analysis of the Eyam plague  
282 outbreak of 1665–1666. *Proceedings of the Royal Society B: Biological Sciences*,  
283 283(1830):20160618, May 2016.
- 284 [13] Daniel R. Curtis and Joris Roosen. The sex-selective impact of the Black Death  
285 and recurring plagues in the Southern Netherlands, 1349-1450. *American Journal of*  
286 *Physical Anthropology*, 164(2):246–259, October 2017.
- 287 [14] Paolo Ulvioni. *Il gran castigo di Dio. Carestia ed epidemie a Venezia e nella Ter-*  
288 *raferma 1628-1632*. Milano, 1989.
- 289 [15] Thi-Nguyen-Ny Tran, Michel Signoli, Luigi Fozzati, Gérard Aboudharam, Didier  
290 Raoult, and Michel Drancourt. High Throughput, Multiplexed Pathogen Detection  
291 Authenticates Plague Waves in Medieval Venice, Italy. *PLoS ONE*, 6(3):e16735,  
292 March 2011.
- 293 [16] Stephen R. Ell. Three days in October of 1630: detailed examination of mortality  
294 during an early modern plague epidemic in Venice. *Review of Infectious Diseases*,  
295 11(1):128–139, 1989.
- 296 [17] Alexandra Bamji. Medical Care in Early Modern Venice. *Journal of Social History*,  
297 49(3):483–509, March 2016.
- 298 [18] Guido Alfani and Samuel K Cohn Jr. Nonantola 1630. anatomia di una pestilenza e  
299 meccanismi del contagio (con riflessioni a partire dalle epidemie milanesi della prima  
300 età moderna). *Popolazione e storia*, 8(2):99–138, 2007.
- 301 [19] Daniele Beltrami. *Storia della popolazione di Venezia dalla fine del secolo XVI alla*  
302 *caduta della Repubblica*. 1954.
- 303 [20] Weiner Gordon M. The Demographic Effects of the Venetian Plagues of 1575-77 and  
304 1630-31. *Genus*, 26(1/2):41–57, 1970.
- 305 [21] Giovanni Favero, Maria Moro, Pierpaolo Spinelli, Francesca Trivellato, and Francesco  
306 Vianello. Le anime dei demografi. Fondi per la rilevazione della popolazione di  
307 Venezia nei secoli XVI e XVII. *Bollettino di demografia storica*, 15:23–110, 1991.
- 308 [22] Sharon N DeWitte. The effect of sex on risk of mortality during the black death  
309 in london, ad 1349–1350. *American Journal of Physical Anthropology: The Official*  
310 *Publication of the American Association of Physical Anthropologists*, 139(2):222–234,  
311 2009.
- 312 [23] Leslie Bradley. The most famous of all english plagues: a detailed analysis of the  
313 plague at eyam 1665-6. *Local Population Studies*, (Supplement 4):63–94, 1977.
- 314 [24] Susan Scott and Christopher J Duncan. *Biology of plagues: evidence from historical*  
315 *populations*. Cambridge University Press, 2001.

- 316 [25] Roger Schofield. An anatomy of an epidemic: Colyton november 1645 to november  
317 1646. *Local Population Studies*, (Supplement 4):95–126, 1977.
- 318 [26] Mario Abrate. *Popolazione e peste del 1630 [ie un mille seicento e trenta] a Car-*  
319 *magnola*, volume 1. Centro studi piemontesi, 1972.
- 320 [27] Matteo Manfredini, Sergio De Iasio, and Enzo Lucchetti. The plague of 1630 in  
321 the territory of parma: Outbreak and effects of a crisis. *International Journal of*  
322 *Anthropology*, 17(1):41–57, 2002.
- 323 [28] Sharon N. DeWitte. Age patterns of mortality during the Black Death in London,  
324 A.D. 1349–1350. *Journal of Archaeological Science*, 37(12):3394–3400, December  
325 2010.
- 326 [29] Stefan Monecke, Hannelore Monecke, and Jochen Monecke. Modelling the black  
327 death. a historical case study and implications for the epidemiology of bubonic plague.  
328 *International Journal of Medical Microbiology*, 299(8):582–593, 2009.
- 329 [30] MJ Keeling and CA Gilligan. Bubonic plague: a metapopulation model of a zoonosis.  
330 *Proceedings of the Royal Society of London B: Biological Sciences*, 267(1458):2219–  
331 2230, 2000.
- 332 [31] Roger Schofield. The last visitation of the plague in sweden: the case of Bräkne-h  
333 oby in 1710–11. *The Economic History Review*, 69(2):600–626, 2016.
- 334 [32] Marcel Salathé and James H Jones. Dynamics and control of diseases in networks  
335 with community structure. *PLoS computational biology*, 6(4):e1000736, 2010.
- 336 [33] Sebastian Schettler. A structured overview of 50 years of small-world research.  
337 *Social networks*, 31(3):165–178, 2009.
- 338 [34] Eric Jones, Travis Oliphant, Pearu Peterson, et al. SciPy: Open source scientific  
339 tools for Python. <https://www.scipy.org/>, 2001.
- 340 [35] Giulio Rossetti, Letizia Milli, Salvatore Rinzivillo, Alina Sirbu, Dino Pedreschi, and  
341 Fosca Giannotti. Ndlb: a python library to model and analyze diffusion processes  
342 over complex networks. *International Journal of Data Science and Analytics*, 5(1):61–  
343 79, Feb 2018.
- 344 [36] Aric A. Hagberg, Daniel A. Schult, and Pieter J. Swart. Exploring network structure,  
345 dynamics, and function using networkx. In Gaël Varoquaux, Travis Vaught, and  
346 Jarrod Millman, editors, *Proceedings of the 7th Python in Science Conference*, pages  
347 11 – 15, Pasadena, CA USA, 2008.

## 348 Methods

349 **Data collection.** The main dataset we consider consists of the daily number of deaths per  
350 parish, from January 1629 to December 1631. We have first proceeded with a full double-  
351 blind counting, then compared the two series, checking and correcting all discrepancies.

352 Secondly, two different co-authors have counted again all deaths from a sample of 20  
353 parishes out of 70 (8 and 12 each), to further assess our main dataset, with the following  
354 results:

- 355 • 1629: 22 errors over 2395 assessed registrations (0,91%).
- 356 • 1630: 60 over 8989 (0,66%).
- 357 • 1631: 16 over 3730 (0,42%).

358 Confirming that the main dataset was already of high quality. Eventually, all remaining  
359 errors were checked again and corrected in the final dataset, which we analyze in this  
360 contribution.

361 We note that the parson of every parish was supposed in principle to a) get a medical  
362 inspection of every dead body to rule out contagious causes, b) report all deaths every  
363 morning to the magistrate called *Provveditori alla Sanità*, c) get burial licenses from this  
364 magistracy before inhumation. Steps a and c usually were not taking place during the  
365 months of peak mortality at the end of the year 1630. It is important to clarify that our  
366 death records include deaths which occurred in the main care institutions in Venice: the  
367 four *Ospedali Grandi* (main hospitals), as well as minor ones, with respect to residents in  
368 the available parishes. They also include all deaths occurred at the *lazzaretti*: temporary  
369 locations setup for quarantine or inhumation of persons affected by the plague. They do  
370 not include foreigners. We finally note that the parish of *S. Nicola* is to be identified with  
371 *San Nicola dei Mendicoli*.

372 **Data analysis and modeling.** All data analysis and modeling are done in Python.  
373 For the general data cleaning we use the `pandas` package. The distance between two  
374 parishes is defined as the geodesic distance between the centers of the corresponding  
375 polygons, defining the jurisdiction of the same parishes. The `geodesic` function from the  
376 `geopy.distance` module is used for this task.

377 All dendrograms (Figure 3) are plotted using the `seaborn.clustermap` package. In par-  
378 ticular, we use the metric `correlation`<sup>1</sup> and the method `complete` to build the linkage  
379 matrix, needed to compute the clusters. The compartmental epidemic models are inte-  
380 grated using the `odeint` function from the `scipy.integrate` module. The parameters  
381 estimations are then obtained using the `curve_fit` and `differential_evolution` func-  
382 tion from the `scipy.optimize` package [34]. In order to account for false positives, we  
383 estimate a baseline of deaths very likely to be unrelated to the plague outbreak, by fitting  
384 a sinusoidal signal from the beginning of the recordings, until the end of August, as shown  
385 in Figure SI5a. In the time-dependent SIR model we assumed a simple step function de-  
386 pendence for both  $\beta(t)$  and  $\gamma(t)$ , leading to a total of five fitted parameters:  $\beta_1, \beta_2, \gamma_1, \gamma_2$   
387 and the transition time  $\tau$  (see again fig SI5d).

388 Stochastic simulations in Figure 4c and SI6a were done using the `ndlib` package [35], on  
389 graphs generated with the `networkx` package [36].

390 The delayed behavioral SIR model (Figure 4c) was defined using the following expression  
391 for the transmission rate  $\beta(t) = \beta_0 e^{-I(t-\tau)/I^*}$ , where  $\beta_0, \tau$  and  $I^*$  were fitted param-  
392 eters, together with the usual (constant) death rate  $\gamma$  and initial number of infected  $I_0$

---

<sup>1</sup>For more details, find here the description of possible metrics: `scipy.spatial.distance.pdist`.

393 ( $\beta_0 = 0.06429$ ,  $I^* = 72$ ,  $\tau = 32$ ,  $\gamma = 0.02859$ ,  $I_0 = 3$ ). For its stochastic implemen-  
394 tation we used a Erdos-Renyi graph, with an edge creation probability  $p = 4/N_{nodes}$   
395 ( $N_{nodes} = 20000$ ).

396

## 397 **Data availability**

398 All code and data needed to reproduce plots and analysis presented in the manuscript  
399 will be made available in a dedicated GitHub repository before publication.

400

## Supplementary Information

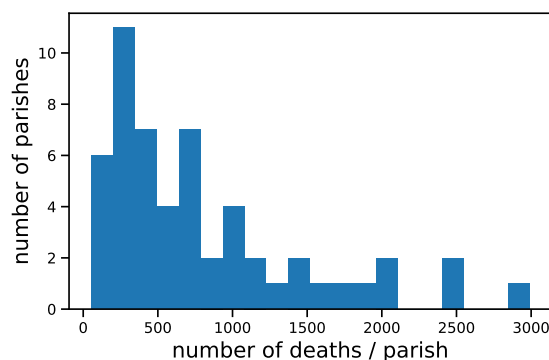

| Parish                | N deaths |
|-----------------------|----------|
| S. Eufemia            | 2089     |
| S. Nicola             | 2097     |
| S. Geremia            | 2405     |
| S. Marcuola           | 2491     |
| S. Pietro di Castello | 2990     |

(b)

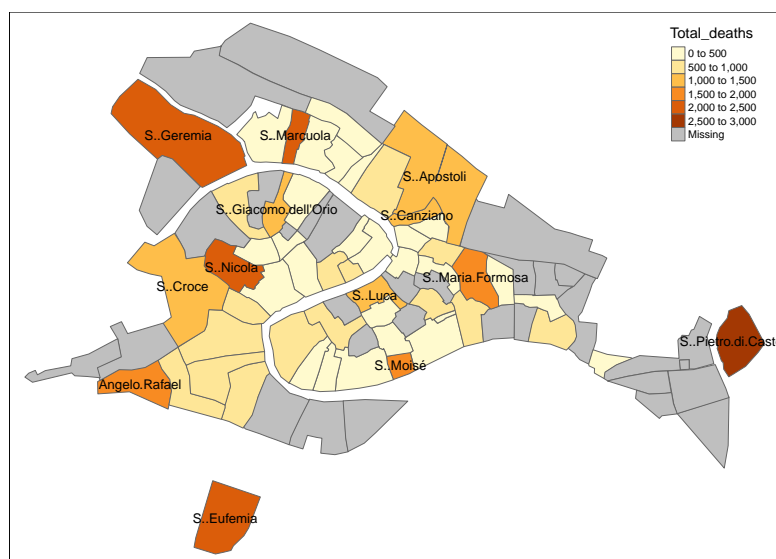

Supplementary Figure SI1: Distribution of number of deaths by parish. (a) One can clearly see the skewed distribution, with the top 24% of parishes accounting for about 55% of the total deaths. (b) For the sake of clarity, only parishes with more than 2000 deaths are listed. (c) Map of Venice parishes, color-coded by total recorded deaths, summed over the entire time-window. For clarity, only the names of parishes with more than 1000 total deaths are shown.

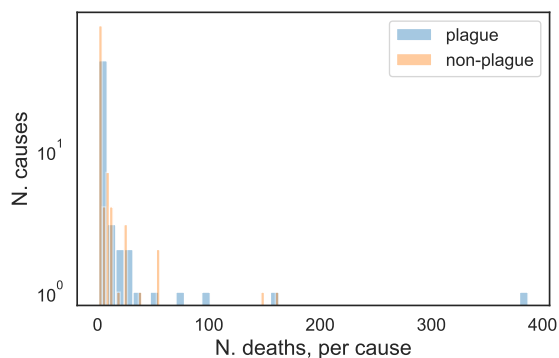

(a)

| Cause of death        | N deaths |
|-----------------------|----------|
| <b>mal sospetto</b>   | 387      |
| febbre                | 163      |
| <b>petecchie nere</b> | 157      |
| spasimo               | 148      |
| <b>contagio</b>       | 100      |
| <b>mal contagioso</b> | 73       |
| vermi                 | 56       |
| nascente              | 54       |

(b)

Supplementary Figure SI2: Distribution of number of deaths by cause, for the parish of *Sant'Eufemia*. In the records, 156 unique causes of death are found, of which 56 were attributed to plague. One can clearly see the skewed distribution, with the top 5% of causes accounting for about 63% of the overall deaths (a). For the sake of clarity, only causes with more than 50 deaths are listed; in bold the ones attributed to plague (b).

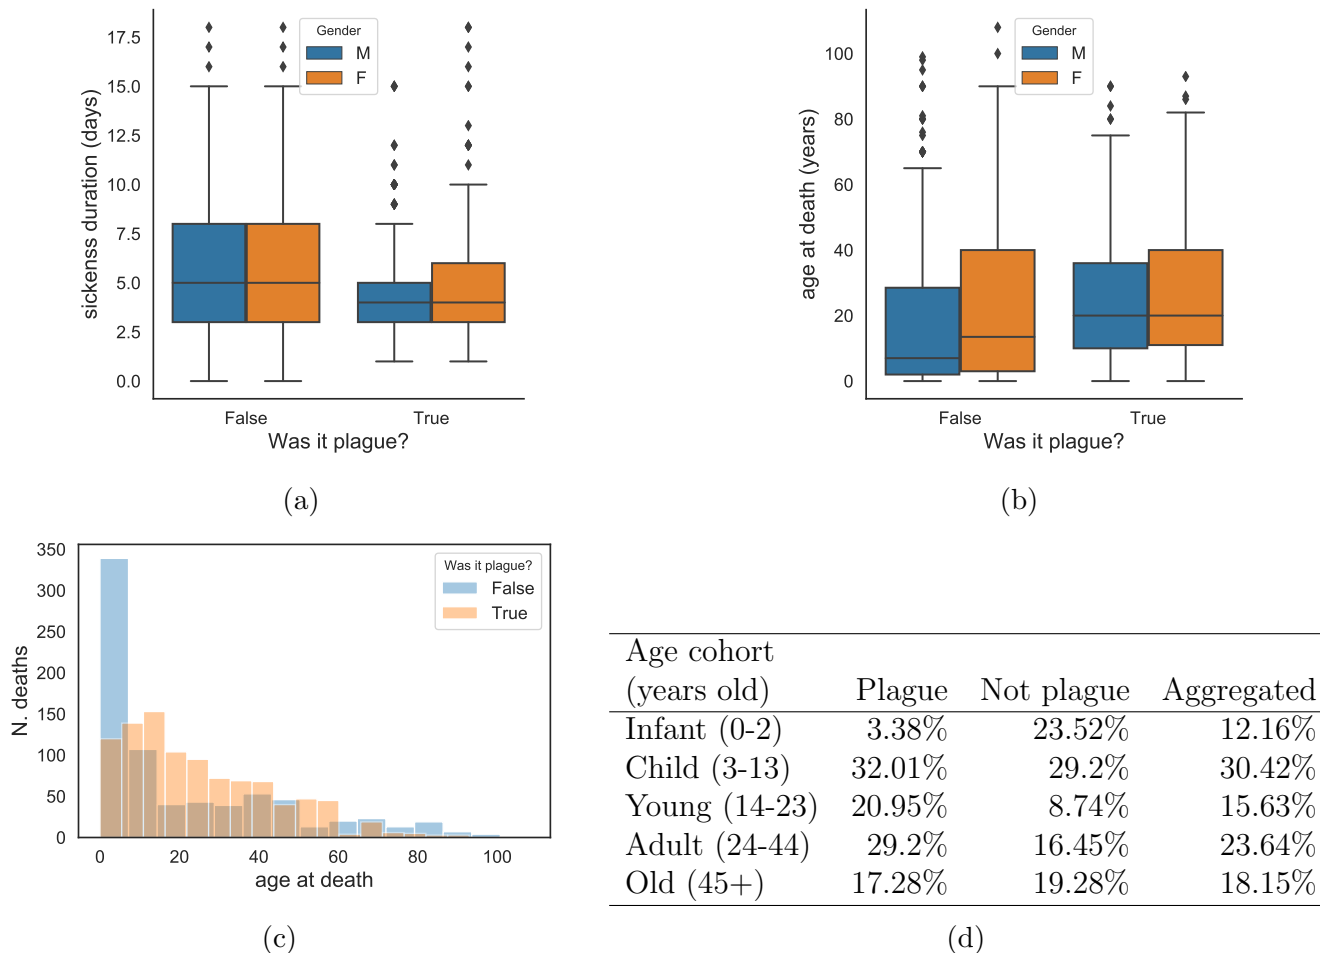

Supplementary Figure SI3: Demographic statistics for the parish of *Sant'Eufemia*. (a) Distribution of sickness duration, by sex and cause of death for *S. Eufemia* death records – for sake of clarity the boxplots include only cases with a sickness spanning less than 20 days (this still covers about 88% of the total sickness duration distribution). (b,c) Distributions of age at death, divided by cause of death. No significant age difference emerges due to sex ( $p > 0.001$  on two samples KS test, for both causes of death) (b), while a significant one appears between the plague VS non-plague deaths, aggregated over sex ( $p < 10^{-20}$  on two samples KS test) (c). (d) Table with the same numbers of deaths, divided into age groups. Note that an infant mortality at birth between 20 and 30% was common at the time [20].



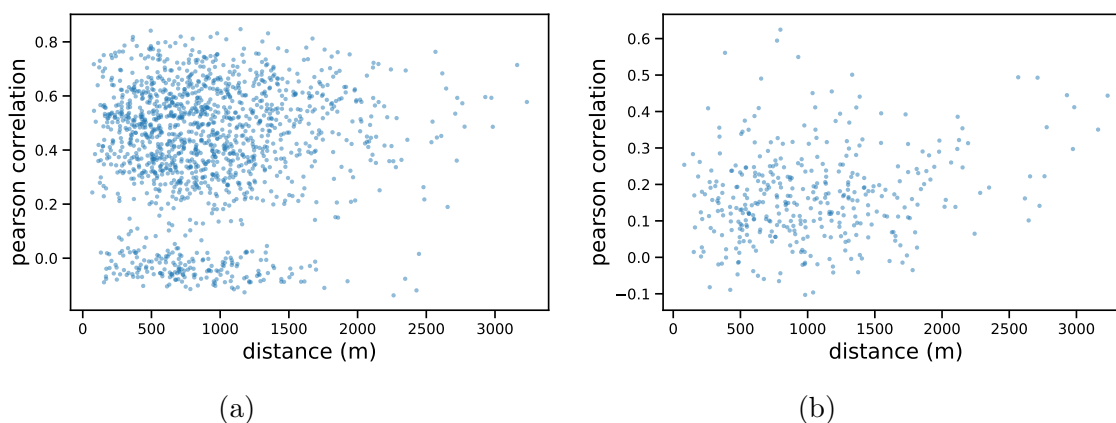

Supplementary Figure SI4: Pairwise Pearson correlation between cases time-series of each couple of parishes, as function of distance between the two parishes. The same scatter plot for all parishes ( $N_{parishes} = 54$ ) for the entire time-windows (a) and for the largest parishes, for the 1631 outbreaks only (b). The largest parishes are defined as those reporting more than 500 deaths ( $N_{parishes} = 28$ ).

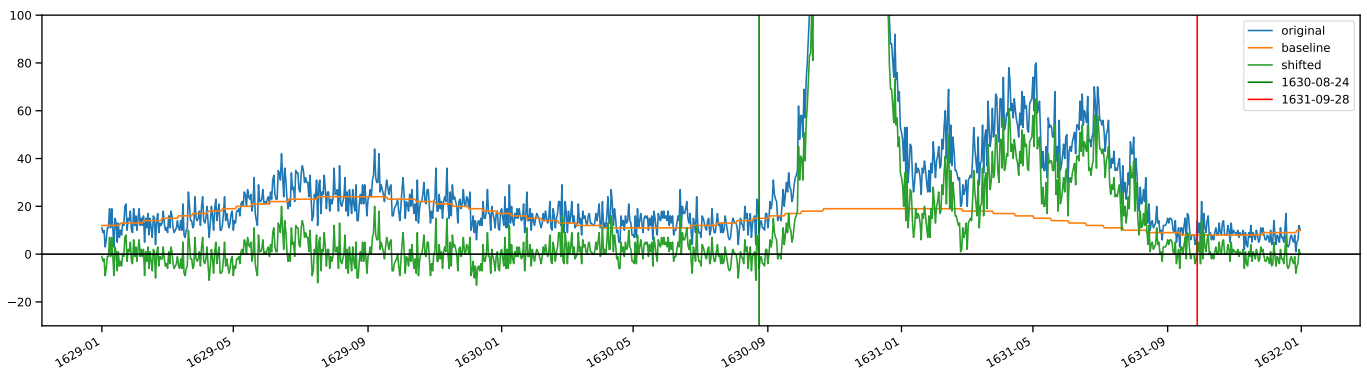

(a)

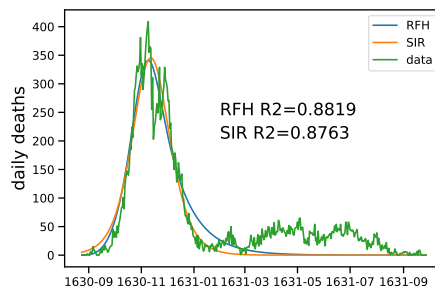

(b)

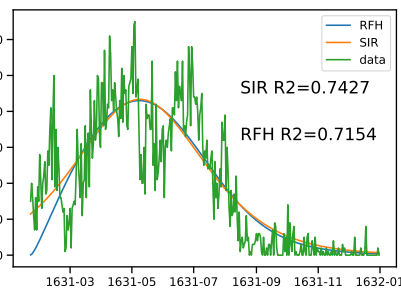

(c)

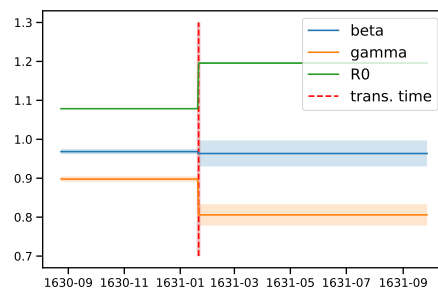

(d)

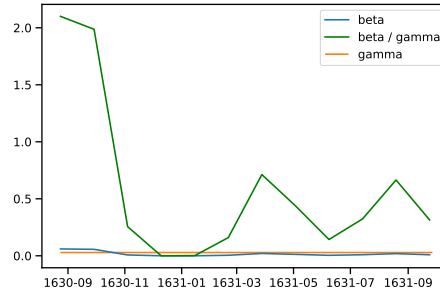

(e)

Supplementary Figure SI5: (a) Estimation of baseline cases due to other causes: a sinus function (orange line) is fitted from the beginning of the data until the beginning of the fit (green vertical line) to estimate the mortality rate, which is then applied to the original data (blue) to get the data used for the fit (green). (b-c) Comparison between a simple SIR and the more complex RFH model, in the 400 days window (b) and zoomed on the second part of the epidemic (c). (d) Fitted parameters for the time-dependent SIR model, as in Figure 4b. (e) Evolution of fitted  $\beta(I)$  and  $\beta(I)/\gamma$  for the delayed behavioral SIR shown in Figure 4c.

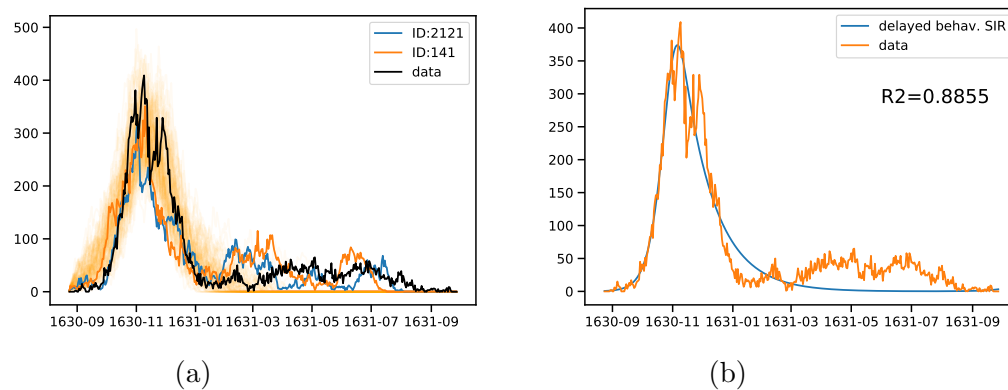

Supplementary Figure SI6: (a) Selected stochastic simulations of a simple SIR model on top of a small-word network. Two particular epidemics are highlighted, in order to show the possibility of having a large peak followed by a long tail, as present in the data. In shaded orange we only show, for sake of clarity, the simulated epidemics with lowest deviation from the data ( $RMSE < 50 - N = 93$ ) (b) Best fit of deterministic behavioral delayed SIR. Although the model can fit very well the first part of the epidemic, it does not show a secondary outbreak, in 1631.

| Death causes               | Related to plague ? | Death causes                     | Related to plague ? |
|----------------------------|---------------------|----------------------------------|---------------------|
|                            |                     | febbre e doglia di schiena       | False               |
| annegato                   | False               | febbre e doglie di testa         | False               |
| apoplessia                 | False               | febbre e ferita                  | False               |
| brusco                     | False               | febbre e flusso                  | False               |
| bubbone pestilenziale      |                     | febbre e gotta                   | False               |
| all'inguine                | <b>True</b>         | febbre e lepra(?)                | False               |
| caduta                     | False               | febbre e mazzucco                | <b>True</b>         |
| caduta                     | False               | febbre e nosella                 | False               |
| caduta apoplettica         | False               | febbre e petecchie               | <b>True</b>         |
| caduto da una scala        | False               | febbre e petecchie nere          | <b>True</b>         |
| caita nella gola           | False               | febbre e petecchie rosse         | <b>True</b>         |
| cancro alla bocca          | False               | febbre e petecchie rosse         |                     |
| carbone                    | <b>True</b>         | non pestilenziali                | False               |
| carboni                    | <b>True</b>         | febbre e punta                   | False               |
| carboni e parto            | <b>True</b>         | febbre e spasimo                 | False               |
| carbonie e petecchie nere  | <b>True</b>         | febbre e suspetto                | <b>True</b>         |
| catare nella gamba         | False               | febbre e un brusco               | False               |
| catarro                    | False               | febbre e una doglia in un fianco | False               |
| contagio                   | <b>True</b>         | febbre e una postima             | False               |
| contagio e petecchie nere  | <b>True</b>         | febbre e una scorencia           | False               |
| convertito etico           | False               | febbre e variole                 | False               |
| croplasion                 | False               | febbre e vecchiezza              | False               |
| disperso                   | False               | febbre e vermi                   | False               |
| doglia di testa            | False               | febbre etica                     | False               |
| doglia di testa e mazzucco | <b>True</b>         | febbre etica e catarro           | False               |
| doglia di testa e vermi    | False               | febbre ferita e flusso           | False               |
| doglia e spasimo           | False               | febbre galica e catarro          | False               |
| dolor di vita              | False               | febbre maligna                   | <b>True</b>         |
| febbre                     | False               | febbre maligna e mal sospetto    | <b>True</b>         |
| febbre                     | False               | febbre maligna e punti           | <b>True</b>         |
| febbre continua            | False               | febbre senza sospetto            | False               |
| febbre continua e          |                     | ferita                           | False               |
| altre indisposizioni       | False               | ferita                           | False               |
| febbre e catarro           | False               | ferita dietro l'orecchio         | False               |
| febbre e doglia            | False               | ferite                           | False               |
|                            |                     | ferite da peste                  | <b>True</b>         |

Supplementary Table SI1: Manual classification of all 156 death causes as reported in necrologies, as associated to plague or not – part 1.

| Death causes               | Related to plague ? | Death causes                  | Related to plague ? |
|----------------------------|---------------------|-------------------------------|---------------------|
| ferito                     | False               |                               |                     |
| flusso                     | False               |                               |                     |
| fracassato la testa        | False               | parto e febbre                | False               |
| illegibile                 | False               | parto e ferita                | False               |
| incinta da febbre e doglie | False               | parto e spasimo               | False               |
| infermo                    | False               | partorito morto               | False               |
| ipolesia                   | False               | patimento                     | False               |
| ipoplessia e febbre        | False               | per non aver avuto latte      | False               |
| macchie nel petto          |                     | percossia                     | False               |
| giudicate pestilenziali    | <b>True</b>         | peste                         | <b>True</b>         |
| mal caduco                 | False               | peste e petecchie nere        | <b>True</b>         |
| mal caduco e vermi         | False               | peste e strupiata             | <b>True</b>         |
| mal contagioso             | <b>True</b>         | petecche paonazze             | <b>True</b>         |
| mal di febbre              | False               | petecchi nere                 | <b>True</b>         |
| mal di gotta               | False               | petecchie                     | <b>True</b>         |
| mal di mare e mal sospetto | <b>True</b>         | petecchie                     | <b>True</b>         |
| mal di mazzucco            | <b>True</b>         | petecchie e febbre maligna    | <b>True</b>         |
| mal di pietra              | False               | petecchie e mazzucco          | <b>True</b>         |
| mal di reni                | False               | petecchie e spasimo           | <b>True</b>         |
| mal mazzucco               | <b>True</b>         | petecchie e un brusco         | <b>True</b>         |
| mal sospetto               | <b>True</b>         | petecchie et un brusco        | <b>True</b>         |
| mal sospetto e petecchie   | <b>True</b>         | petecchie nere                | <b>True</b>         |
| mazzucco                   | <b>True</b>         | petecchie nere                | <b>True</b>         |
| morto improvvisamente      | False               | petecchie nere contagiose     | <b>True</b>         |
| n.d.                       | False               | petecchie nere e carbone      | <b>True</b>         |
| nascente                   | False               | petecchie nere e rosse        | <b>True</b>         |
| non aver latte             | False               | petecchie nere pestilenziali  | <b>True</b>         |
| non si sa il male          | False               | petecchie pestilenziali       | <b>True</b>         |
| nosella                    | False               | petecchie rosse               | <b>True</b>         |
| nosella di mal contagioso  | <b>True</b>         | petecchie rosse e alcune nere | <b>True</b>         |
| nosella nel cuore          | False               | petecchie rosse e parto       | <b>True</b>         |
| paralitico senza contagio  | False               | petecchie rosse verso il nero | <b>True</b>         |
| parto                      | False               |                               |                     |

Supplementary Table SI2: Manual classification of all 156 death causes as reported in necrologies, as associated to plague or not – part 2.

| Death causes             | Related<br>to<br>plague<br>? |
|--------------------------|------------------------------|
| punta                    | False                        |
| rogna                    | False                        |
| sconosciuta              | False                        |
| sempre infermo           | False                        |
| senza peste esterna      | False                        |
| senza sospetto           | False                        |
| spasimo                  | False                        |
| spasimo e infermitá      | False                        |
| spasimo e mazzucco       | <b>True</b>                  |
| spasimo e petecchie nere | <b>True</b>                  |
| spasimo e sturioli       | False                        |
| spasimo e vecchiezza     | False                        |
| spasimo e vermi          | False                        |
| stroppiata su la palada  | False                        |
| strupiata                | False                        |
| tumore                   | False                        |
| tumore alla gola         | False                        |
| un carbon                | <b>True</b>                  |
| variole                  | False                        |
| variole e sturioli       | False                        |
| vecchiezza               | False                        |
| vecchiezza e febbre      | False                        |
| vermi                    | False                        |
| vermi e petecchie        | <b>True</b>                  |
| vermi e spasimo          | False                        |

Supplementary Table SI3: Manual classification of all 156 death causes as reported in necrologies, as associated to plague or not – part 3.
